# Supplementary material
Source: MDPI journal article supplement (https://www.mdpi.com/2311-5637/9/9/843)
Supplement: s1 [file s1]

**Table S1.** Total amino acid profile of CBS and CPH (mg/100g DM). Results of chemical analyses are the means of three replicates with standard deviation below 5%.

| Amino acid    | CPH    | CBS     |
|---------------|--------|---------|
| Histidine     | 35.23  | 149.69  |
| Arginine      | 147.07 | 626.84  |
| Serine        | 225.37 | 700.08  |
| Glycine       | 169.36 | 678.14  |
| Aspartic      | 434.15 | 1529.94 |
| Glutamic      | 495.33 | 2011.19 |
| Threonine     | 150.86 | 590.27  |
| Alanine       | 206.16 | 805.64  |
| Proline       | 214.71 | 744.13  |
| Lysine        | 261.35 | 1015.78 |
| Methionine    | nd     | 182.85  |
| Tyrosine      | 78.61  | 519.92  |
| Valine        | 141.88 | 578.51  |
| Cysteine      | 32.33  | 118.17  |
| Isoleucine    | 101.75 | 428.40  |
| Leucine       | 243.17 | 870.03  |
| Phenylalanine | 146.14 | 540.99  |
| Tryptophan    | 55.02  | 128.90  |

nd: non detectable

**Table S2.** Fatty acid profile of cocoa pod and cocoa shell (mg/100g DM) Results are the means of three replicates with standard deviation below 5%.

| Fatty acid<br>(% of fatty acids) | CPH    | CBS    |
|----------------------------------|--------|--------|
| C10:0                            | 0.027  | 0.000  |
| C12:0                            | 0.484  | 0.029  |
| C14:0                            | 1.732  | 0.140  |
| C15:0                            | 0.258  | 0.057  |
| C16:0                            | 29.921 | 31.112 |
| C16:1n7                          | 0.134  | 0.000  |
| C16:1n9                          | 0.000  | 0.314  |
| C17:0                            | 0.293  | 0.258  |
| C17:1n7                          | 0.102  | 0.036  |
| C17:1n8                          | 0.000  | 0.082  |
| C18:0                            | 25.213 | 27.184 |
| C18:1n9 oleic                    | 22.991 | 34.327 |
| C18:2n6 linoleic                 | 15.031 | 4.674  |
| C18:2n6t                         | 0.072  | 0.000  |
| C18:3n6                          | 0.053  | 0.023  |
| C19:0                            | 0.0058 | 0.014  |
| C18:3n3                          | 0.972  | 0.253  |
| C20:0                            | 1.026  | 0.855  |
| C20:1n9                          | 0.070  | 0.058  |
| C20:2n6                          | 0.048  | 0.009  |
| C21:0                            | 0.017  | 0.015  |
| C20:3n3                          | 0.104  | 0.019  |
| C20:4n6 arachidonic              | 0.036  | 0.000  |
| C20:5n3 EPA                      | 0.046  | 0.000  |
| C22:0                            | 0.448  | 0.212  |
| C22:1n9 erucic                   | 0.069  | 0.000  |
| C22:2n6                          | 0.025  | 0.000  |
| C23:0                            | 0.204  | 0.000  |
| C24:0                            | 0.567  | 0.331  |

EPA: Eicosapentaenoic acid
